# Supplementary material for: Partial Inhibition of Adipose Tissue Lipolysis Improves Glucose Metabolism and Insulin Sensitivity Without Alteration of Fat Mass
Source: PubMed Central journal article supplement (PMC3576369; doi:10.1371/journal.pbio.1001485), 2013-02-19

# SUPPLEMENTAL FIGURE 3

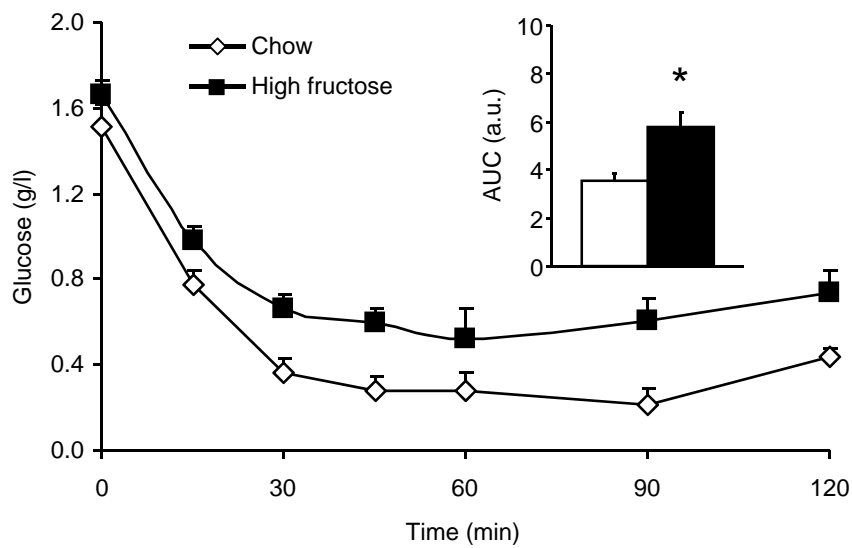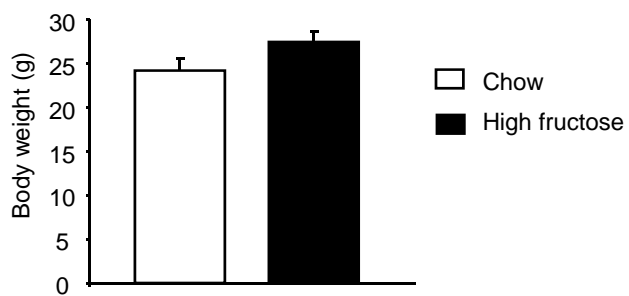

Supplement: pbio.1001485.s003.pdf [file pbio.1001485.s003.pdf]
